# Supplementary material
Source: PubMed Central journal article supplement (PMC2650015)

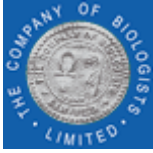

Submit your manuscript  
ONLINE

QUICK SEARCH: [advanced]  
Author: Keyword(s):  
Go

# Development

[Home](#) [Help](#) [Feedback](#) [Subscriptions](#) [Archive](#) [Search](#) [Table of Contents](#)

Institution: Texas Univ Southwestern Medical Center | [Sign In as Individual](#)

## Essential roles of the acetylcholine receptor $\gamma$ -subunit in neuromuscular synaptic patterning

Development Liu et al. 135: 1957

## DEV018119 Supplementary Material

### Files in this Data Supplement:

- [Supplemental Figure S1](#) -

**Fig. S1. Distribution of AChRs in the absence of the  $\gamma$ -subunit.** (A) Whole-mount diaphragm muscles from E15.5 wild-type and  $\gamma^{-/-}$  embryos were incubated with Texas Red-conjugated  $\alpha$ -bungarotoxin ( $\alpha$ -bgt). Images were collected with a low-power objective (10 $\times$ ) so the entire length of muscle fibers could be viewed under the same field. The  $\alpha$ -bgt labeled AChRs were clustered in the central region of the wild-type muscle, but remained diffuse in the  $\gamma^{-/-}$  muscle. Despite the diffused pattern, the central region (marked by the broken lines) of the  $\gamma^{-/-}$  muscle was still more intensely labeled, compared with its flanking region. (B) The difference in fluorescence intensity was presented in a line-scan. The entire muscle fiber was manually traced from one end to the other ( $\sim$ 800  $\mu$ m) using NIH ImageJ software. The gray levels of each pixel were measured and plotted against its position along the muscle fiber (wild-type, black line;  $\gamma^{-/-}$ , grey line). The central region of the  $\gamma^{-/-}$  muscle appeared more intensely labeled than its flanking region.

- [Supplemental Figure S2](#) -

**Fig. S2. Innervation pattern of hind limb muscles in wild-type and  $\gamma^{-/-}$  mice.** (A,B) Cross-section of E18.5 hind limb, stained with Hematoxylin and Eosin (H&E); note the apparent atrophy of the  $\gamma^{-/-}$  muscles (B). (C,D) Low-magnification view of hind limb sections immunostained with synaptotagmin 2 (Syt2) antibody. Note a dramatic increase of innervation in all muscles in the  $\gamma^{-/-}$  embryos (D), when compared with the wild-type muscles (C). (E-H) Higher magnification views of EDL and soleus are shown in the bottom row: nerve terminals in the wild-type muscles localized to small regions of the muscle (arrowheads in E,F), whereas nerve terminals in the  $\gamma^{-/-}$  muscles were broadly distributed (arrows in G,H). TA, tibias anterior muscle; EDL, extensor digitorum longus muscle; MG, medial gastrocnemius muscle; LG, lateral gastrocnemius muscle; Sol, soleus; F, fibula. Scale bars: 200  $\mu$ m in A-D; 100 $\mu$ m in E-H.

- [Supplemental Figure S3](#) -

**Fig. S3. Differentiation of the presynaptic nerve terminals at E16.5.** Whole-mount diaphragm muscles labeled with synaptotagmin 2 (Syt2) antibody (A,D) and Texas-Red conjugated  $\alpha$ -bungarotoxin (B,E). AChR clusters in the  $\gamma^{-/-}$  muscle (arrowheads in E) were markedly reduced, compared with those

This Article

▶ [Summary](#)

▶ [Full Text](#)

Services

▶ [Email this article to a friend](#)

▶ [Alert me to new issues of the journal](#)

▶ [Get Permissions](#)

in the wild-type muscles (E). However, individual nerve terminals were intensely labeled by Syt2 antibody in both wild-type (arrowheads in A) and in  $\gamma^{-/-}$  muscles (arrowheads in D), although the nerve terminals in  $\gamma^{-/-}$  muscles were distributed across a much broader region. The majority of the nerve terminals in the wild-type muscle were closely apposed by AChR clusters (arrowheads in C), whereas the majority of the nerve terminals in the  $\gamma^{-/-}$  muscles were not apposed by AChR clusters (arrows in F). Note, however, that aneural AChR clusters were still present in the wild-type muscles (arrows in B,C). Scale bar: 30  $\mu\text{m}$

- [Supplemental Figure S4](#) -

**Fig. S4. Low magnification views of whole-mount diaphragm muscles immunolabeled by synaptotagmin 2 antibody.** In wild-type muscle, nerve terminals (arrowhead in A) were localized along the central region of the muscle; occasionally, some nerve sprouts (arrows in A) extended beyond the central region. In the  $\gamma^{-/-}$  muscle, nerve terminals (arrowheads in B) were distributed across a broad region of the muscle, especially at the dorsal quadrant of the diaphragm. Excessive nerve sprouts were seen across the entire region (arrows in B). Scale bar: 500  $\mu\text{m}$ .

*This Article*

- ▶ [Summary](#)
- ▶ [Full Text](#)

*Services*

- ▶ [Email this article to a friend](#)
- ▶ [Alert me to new issues of the journal](#)
- ▶ [© Get Permissions](#)

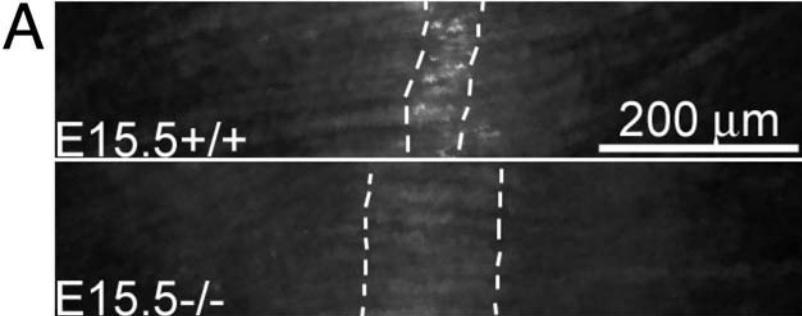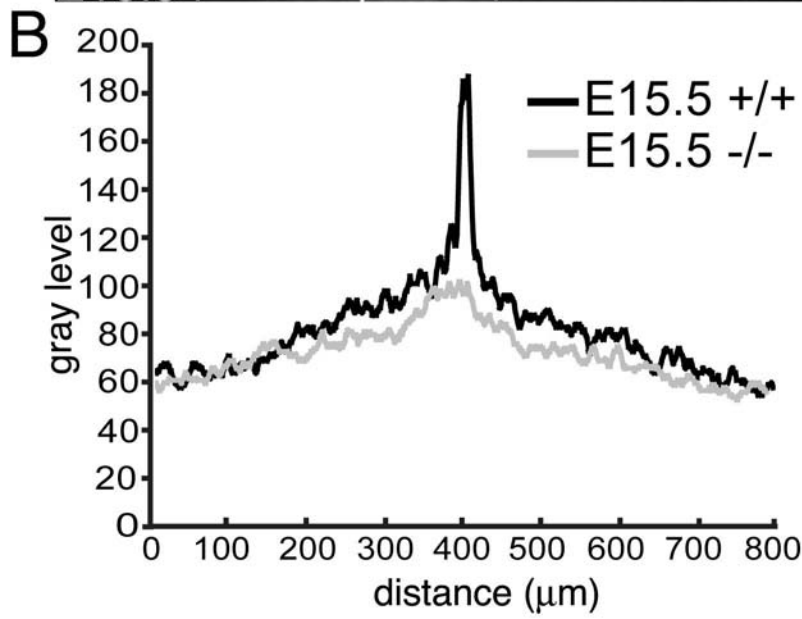

E18.5 +/+

E18.5 -/-

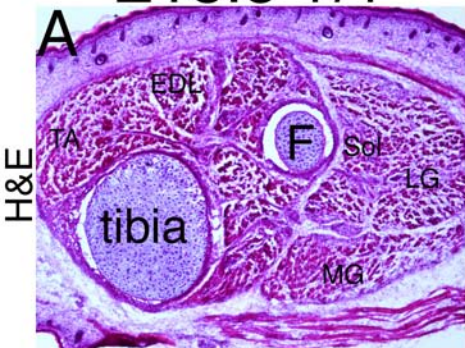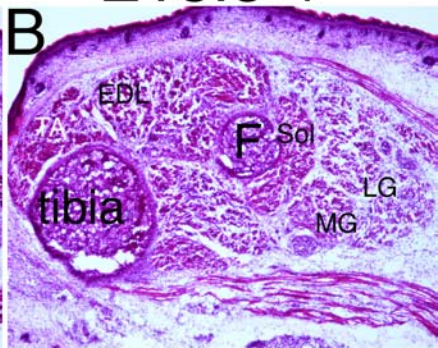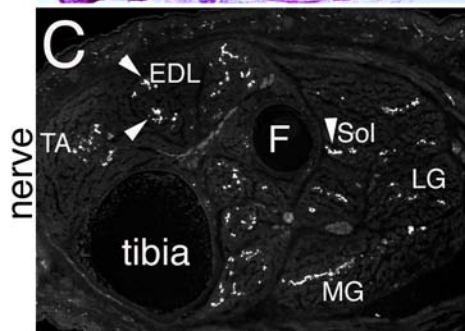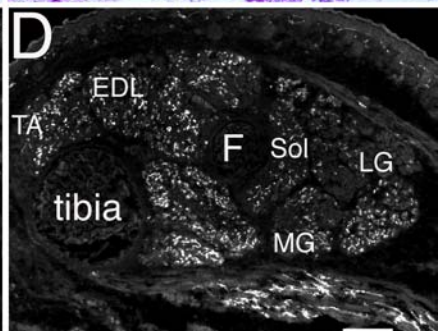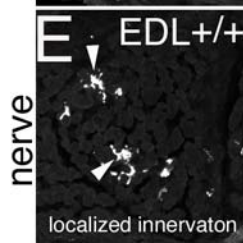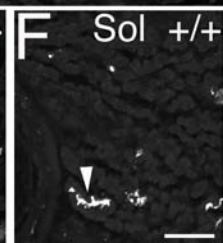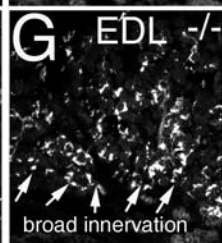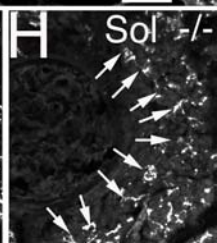

synaptotagmin-2

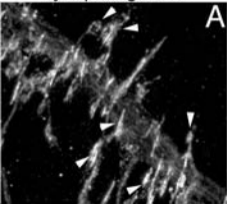 $\alpha$ -bungarotoxin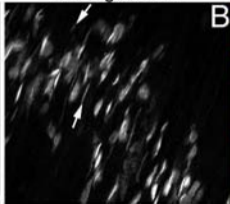

merged

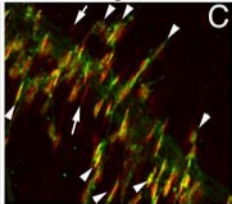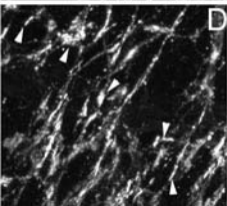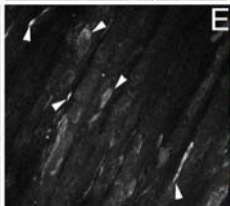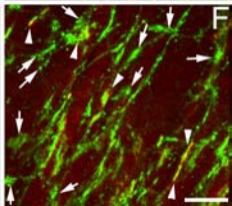

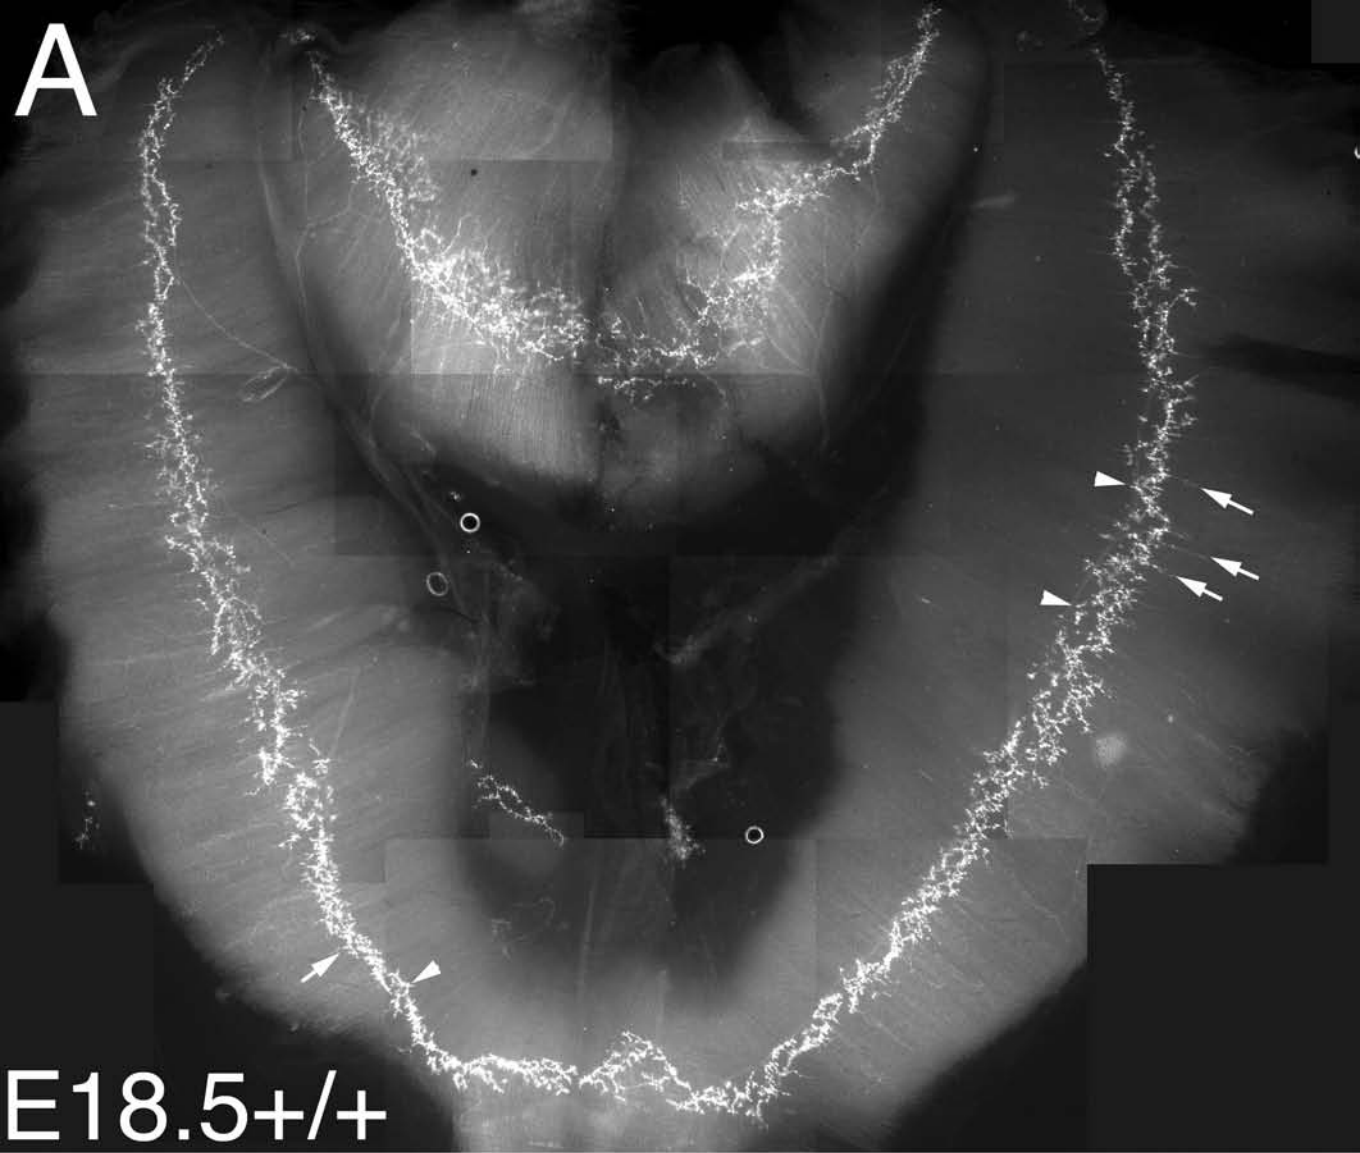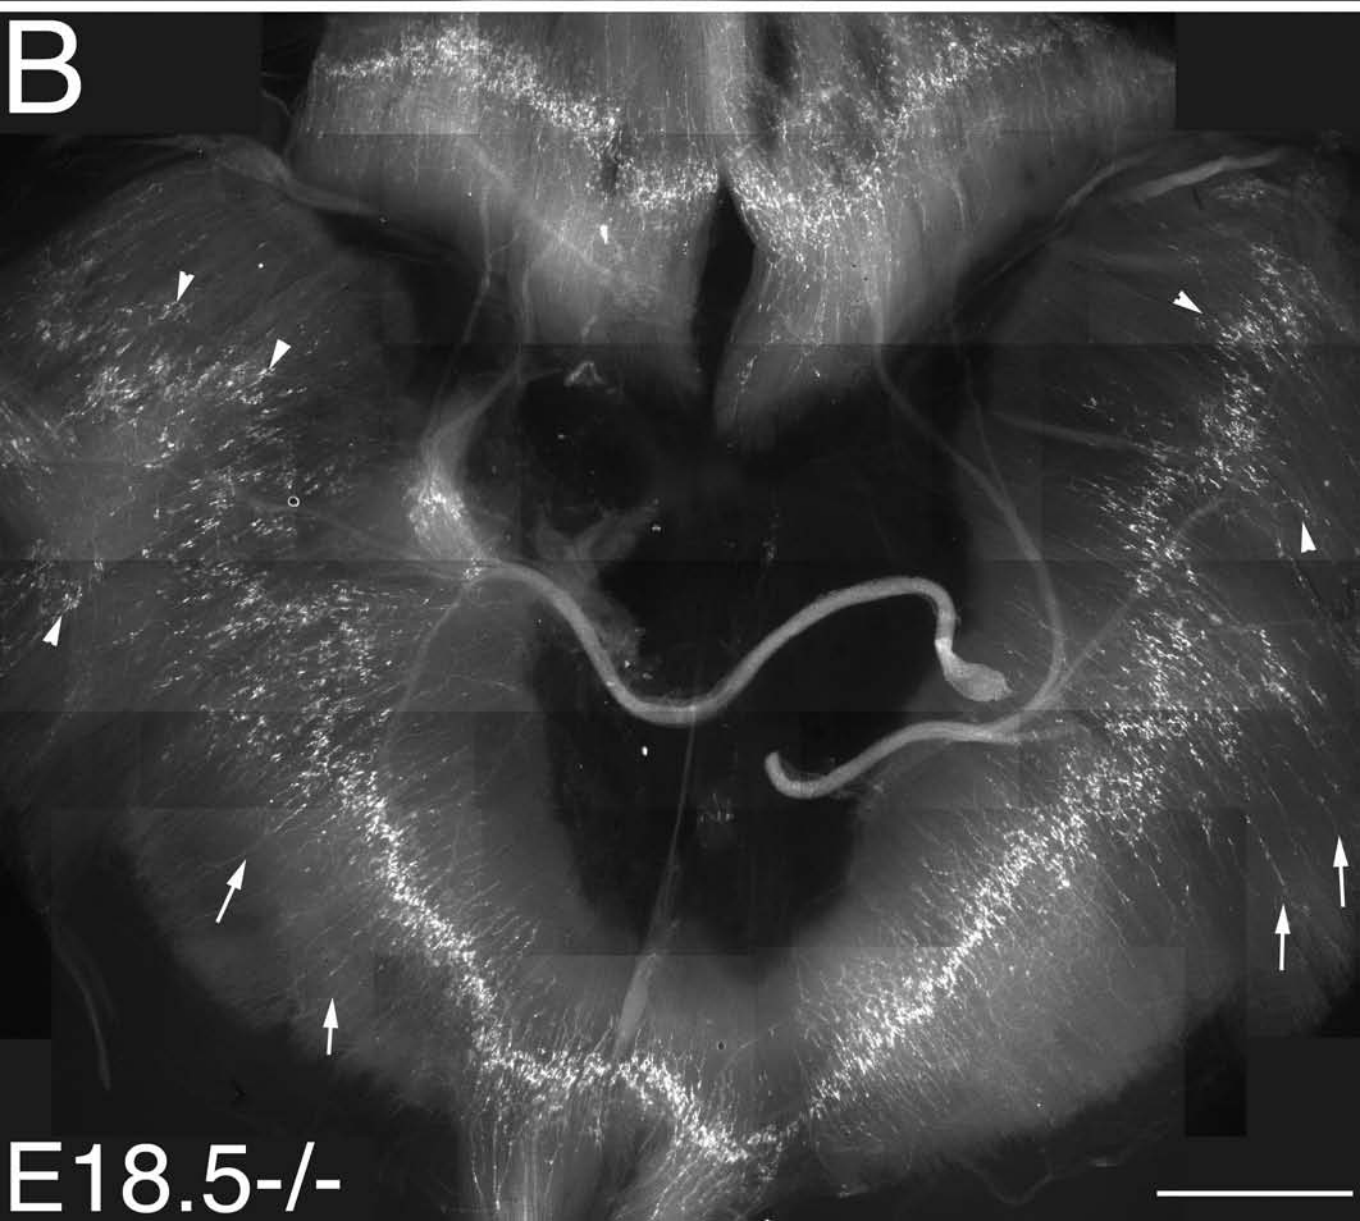

Supplement: NIHMS93711-supplement-supplement_1.pdf [file NIHMS93711-supplement-supplement_1.pdf]
